# Supplementary material for: Study on dechlorination salt characteristics of pickling sludge by a water-washing process
Source: Royal Society of Chemistry journal article supplement (doi:10.1039/d3ra05451a), 2024-01-01
Supplement: d3ra05451a1.pdf [file d3ra05451a1.pdf]

## Supplementary information

**Table 1S** Element content in FR under different L/S ratio

| sample | L/S | chemical composition (%) |      |       |       |      |      |       |      |      |       |       |
|--------|-----|--------------------------|------|-------|-------|------|------|-------|------|------|-------|-------|
|        |     | Ca                       | Na   | K     | Mg    | Si   | Al   | Cl    | P    | S    | Fe    | Zn    |
| SHPS 1 | 0:1 | 3.18                     | 3.31 | 0.05  | 0.03  | 1.99 | 0.17 | 8.76  | 0.02 | 0.02 | 37.32 | 13.89 |
|        | 2:1 | 2.11                     | 0.73 | 0.03  | 0.02  | 2.29 | 0.19 | 3.35  | 0.02 | 0.02 | 43.10 | 16.04 |
|        | 3:1 | 1.99                     | 0.64 | 0.03  | 0.02  | 2.36 | 0.20 | 2.79  | 0.02 | 0.02 | 44.35 | 16.50 |
|        | 4:1 | 1.77                     | 0.53 | 0.03  | 0.02  | 2.38 | 0.20 | 1.83  | 0.02 | 0.02 | 44.81 | 16.67 |
|        | 5:1 | 1.49                     | 0.19 | 0.02  | 0.02  | 2.45 | 0.21 | 0.94  | 0.02 | 0.01 | 46.05 | 17.13 |
| SHPS 2 | 0:1 | 11.11                    | 0.38 | 0.13  | 0.19  | 4.78 | 0.21 | 12.13 | 0.01 | 0.37 | 29.80 | 4.21  |
|        | 2:1 | 7.38                     | 0.16 | 0.099 | 0.15  | 5.82 | 0.25 | 5.85  | 0.01 | 0.31 | 36.38 | 5.13  |
|        | 3:1 | 6.98                     | 0.10 | 0.089 | 0.15  | 5.97 | 0.26 | 4.44  | 0.01 | 0.29 | 37.32 | 5.26  |
|        | 4:1 | 6.59                     | 0.06 | 0.074 | 0.15  | 6.14 | 0.27 | 3.52  | 0.01 | 0.29 | 38.41 | 5.41  |
|        | 5:1 | 6.41                     | 0.03 | 0.061 | 0.13  | 6.28 | 0.27 | 1.84  | 0.01 | 0.28 | 38.79 | 5.48  |
| SHPS 3 | 0:1 | 0.32                     | 3.21 | 0.01  | 0.14  | 1.58 | 0.64 | 5.21  | 0.01 | 0.08 | 55.31 | 0.02  |
|        | 2:1 | 0.20                     | 0.60 | 0.007 | 0.094 | 1.70 | 0.67 | 0.96  | 0.01 | 0.06 | 59.68 | 0.02  |
|        | 3:1 | 0.19                     | 0.52 | 0.006 | 0.094 | 1.71 | 0.69 | 0.91  | 0.01 | 0.06 | 60.02 | 0.02  |
|        | 4:1 | 0.16                     | 0.32 | 0.005 | 0.092 | 1.72 | 0.70 | 0.44  | 0.01 | 0.05 | 60.20 | 0.02  |
|        | 5:1 | 0.14                     | 0.07 | 0.005 | 0.091 | 1.73 | 0.70 | 0.40  | 0.01 | 0.05 | 60.74 | 0.03  |

**Table 2S** Element content in FR under different SHPS particle size

| sample    | size | chemical composition (%) |      |      |      |      |      |      |      |      |       |       |
|-----------|------|--------------------------|------|------|------|------|------|------|------|------|-------|-------|
|           |      | Ca                       | Na   | K    | Mg   | Si   | Al   | Cl   | P    | S    | Fe    | Zn    |
| SHPS<br>1 | 60   | 1.99                     | 0.64 | 0.03 | 0.02 | 2.36 | 0.20 | 2.79 | 0.02 | 0.02 | 44.35 | 16.50 |
|           | 100  | 1.97                     | 0.61 | 0.03 | 0.02 | 2.37 | 0.20 | 2.04 | 0.02 | 0.02 | 44.54 | 16.57 |
|           | 140  | 1.97                     | 0.60 | 0.02 | 0.02 | 2.39 | 0.20 | 2.00 | 0.02 | 0.02 | 44.88 | 16.69 |
|           | 180  | 1.96                     | 0.58 | 0.03 | 0.02 | 2.40 | 0.20 | 2.00 | 0.02 | 0.02 | 45.14 | 16.79 |
| SHPS      | 60   | 6.98                     | 0.10 | 0.09 | 0.15 | 5.97 | 0.26 | 4.44 | 0.01 | 0.29 | 37.32 | 5.26  |

|           |     |      |      |       |      |      |       |      |      |      |       |       |
|-----------|-----|------|------|-------|------|------|-------|------|------|------|-------|-------|
| 2         | 100 | 6.98 | 0.09 | 0.09  | 0.15 | 6.14 | 0.27  | 1.99 | 0.01 | 0.29 | 38.37 | 5.41  |
|           | 140 | 6.96 | 0.09 | 0.09  | 0.15 | 6.14 | 0.27  | 1.93 | 0.01 | 0.29 | 38.41 | 5.41  |
|           | 180 | 6.94 | 0.09 | 0.09  | 0.15 | 6.18 | 0.27  | 1.83 | 0.01 | 0.29 | 38.66 | 5.45  |
| SHPS<br>3 | 60  | 0.19 | 0.52 | 0.006 | 0.09 | 1.71 | 0.69  | 0.91 | 0.01 | 0.06 | 60.02 | 0.02  |
|           | 100 | 0.17 | 0.45 | 0.006 | 0.09 | 1.71 | 0.670 | 0.65 | 0.01 | 0.05 | 60.27 | 0.022 |
|           | 140 | 0.17 | 0.43 | 0.006 | 0.09 | 1.72 | 0.70  | 0.63 | 0.01 | 0.05 | 60.49 | 0.022 |
|           | 180 | 0.17 | 0.42 | 0.006 | 0.09 | 1.73 | 0.70  | 0.61 | 0.01 | 0.05 | 60.73 | 0.022 |

**Table 3S** Element content in FR under different washing time

| sample    | time/min | chemical composition (%) |      |       |      |      |      |      |      |      |       |       |
|-----------|----------|--------------------------|------|-------|------|------|------|------|------|------|-------|-------|
|           |          | Ca                       | Na   | K     | Mg   | Si   | Al   | Cl   | P    | S    | Fe    | Zn    |
| SHPS<br>1 | 5        | 2.43                     | 1.76 | 0.03  | 0.02 | 2.14 | 0.18 | 4.88 | 0.02 | 0.02 | 40.21 | 14.96 |
|           | 10       | 1.97                     | 0.61 | 0.03  | 0.02 | 2.37 | 0.20 | 2.04 | 0.02 | 0.02 | 44.54 | 16.57 |
|           | 30       | 1.94                     | 0.59 | 0.03  | 0.02 | 2.37 | 0.20 | 1.98 | 0.02 | 0.02 | 44.65 | 16.61 |
|           | 50       | 1.95                     | 0.59 | 0.03  | 0.02 | 2.38 | 0.20 | 1.97 | 0.02 | 0.02 | 44.82 | 16.67 |
|           | 70       | 1.94                     | 0.57 | 0.03  | 0.02 | 2.39 | 0.20 | 1.94 | 0.02 | 0.02 | 44.90 | 16.70 |
| SHPS<br>2 | 5        | 8.46                     | 0.21 | 0.10  | 0.16 | 5.36 | 0.23 | 6.13 | 0.01 | 0.32 | 33.47 | 4.72  |
|           | 10       | 6.98                     | 0.09 | 0.09  | 0.15 | 6.14 | 0.27 | 1.99 | 0.01 | 0.29 | 38.37 | 5.41  |
|           | 30       | 6.92                     | 0.09 | 0.09  | 0.15 | 6.15 | 0.27 | 1.94 | 0.01 | 0.29 | 38.45 | 5.42  |
|           | 50       | 6.90                     | 0.09 | 0.09  | 0.15 | 6.16 | 0.27 | 1.90 | 0.01 | 0.29 | 38.54 | 5.43  |
|           | 70       | 6.88                     | 0.09 | 0.09  | 0.15 | 6.18 | 0.27 | 1.88 | 0.01 | 0.29 | 38.66 | 5.45  |
| SHPS<br>3 | 5        | 0.27                     | 1.49 | 0.007 | 0.11 | 4.01 | 0.84 | 2.38 | 0.01 | 0.06 | 58.23 | 0.02  |
|           | 10       | 0.17                     | 0.45 | 0.006 | 0.09 | 1.72 | 0.70 | 0.65 | 0.01 | 0.05 | 60.27 | 0.02  |
|           | 30       | 0.17                     | 0.44 | 0.006 | 0.09 | 1.72 | 0.70 | 0.65 | 0.01 | 0.05 | 60.38 | 0.02  |
|           | 50       | 0.17                     | 0.44 | 0.006 | 0.09 | 1.72 | 0.70 | 0.64 | 0.01 | 0.05 | 60.54 | 0.02  |
|           | 70       | 0.17                     | 0.43 | 0.006 | 0.09 | 1.73 | 0.70 | 0.63 | 0.01 | 0.05 | 60.69 | 0.02  |

**Table 4S** Element content in FR under different washing frequency

| sample | frequency | chemical composition (%) |        |       |      |      |      |       |      |      |       |       |
|--------|-----------|--------------------------|--------|-------|------|------|------|-------|------|------|-------|-------|
|        |           | Ca                       | Na     | K     | Mg   | Si   | Al   | Cl    | P    | S    | Fe    | Zn    |
| SHPS 1 | 1         | 1.97                     | 0.61   | 0.03  | 0.02 | 2.37 | 0.20 | 2.04  | 0.02 | 0.02 | 44.54 | 16.57 |
|        | 2         | 1.72                     | 0.18   | 0.03  | 0.02 | 2.45 | 0.21 | 1.04  | 0.02 | 0.02 | 46.01 | 17.11 |
|        | 3         | 1.59                     | 0.005  | 0.03  | 0.02 | 2.50 | 0.21 | 0.29  | 0.03 | 0.02 | 46.97 | 17.47 |
|        | 4         | 1.46                     | 0.002  | 0.03  | 0.02 | 2.54 | 0.22 | 0.03  | 0.03 | 0.02 | 47.82 | 17.79 |
| SHPS 2 | 1         | 6.98                     | 0.09   | 0.09  | 0.15 | 6.14 | 0.27 | 1.99  | 0.01 | 0.29 | 38.37 | 5.41  |
|        | 2         | 6.53                     | 0.028  | 0.09  | 0.15 | 6.33 | 0.28 | 0.70  | 0.01 | 0.29 | 39.56 | 5.57  |
|        | 3         | 6.35                     | 0.002  | 0.08  | 0.16 | 6.54 | 0.29 | 0.05  | 0.01 | 0.29 | 40.89 | 5.76  |
|        | 4         | 6.49                     | 0.0002 | 0.08  | 0.16 | 6.70 | 0.29 | 0.01  | 0.01 | 0.29 | 41.92 | 5.91  |
| SHPS 3 | 1         | 0.23                     | 0.447  | 0.006 | 0.09 | 1.72 | 0.70 | 0.65  | 0.01 | 0.05 | 60.27 | 0.02  |
|        | 2         | 0.23                     | 0.094  | 0.006 | 0.09 | 1.76 | 0.72 | 0.20  | 0.01 | 0.05 | 61.94 | 0.02  |
|        | 3         | 0.20                     | 0.004  | 0.005 | 0.09 | 1.80 | 0.73 | 0.002 | 0.01 | 0.05 | 63.26 | 0.02  |
|        | 4         | 0.20                     | 0.001  | 0.005 | 0.09 | 1.81 | 0.73 | 0.001 | 0.01 | 0.05 | 63.64 | 0.02  |
